# Supplementary material for: Dye-sensitized solar cell from a new organic n-type semiconductor/polyaniline composite: insight from impedance spectroscopy
Source: Royal Society of Chemistry journal article supplement (doi:10.1039/c5tc03072b), 2015-11-18
Supplement: c5tc03072b1.pdf [file c5tc03072b1.pdf]

*Supporting Information*

**Dye-Sensitized Solar Cell from a New Organic n-Type Semiconductor/**

**Polyaniline Composite: Insight from Impedance Spectroscopy**

Pousali Chal, Arnab Shit and Arun K. Nandi\*

Polymer Science unit, Indian Association for the Cultivation of Science,

Jadavpur, Kolkata- 700032, India

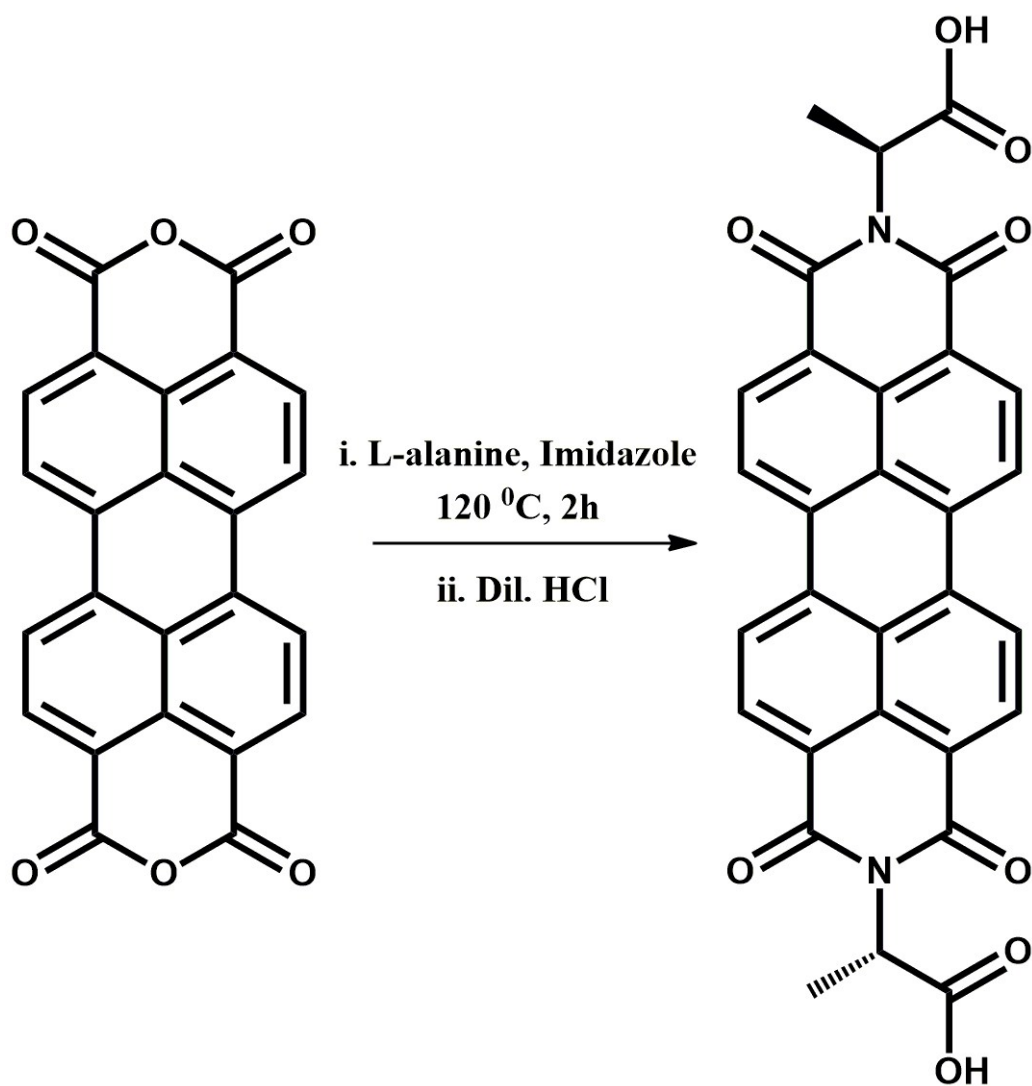

**Scheme S1:** Synthesis of PTCDA

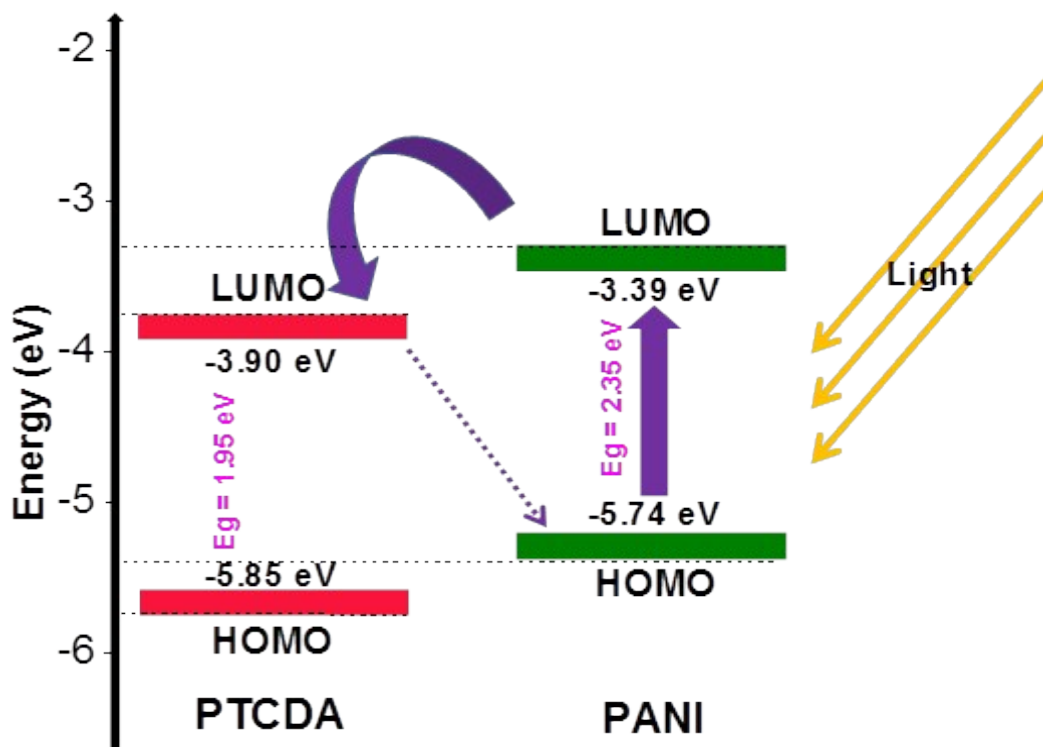

**Scheme S2:** Mechanism of the photoconduction process of PANI-PTCDA composites under AM1.5 illumination

**Table S1:** DSSC characteristics of P15 based solar cell for aging at 40 °C for different times

| Time (hr) | $J_{sc}$ (mA/cm <sup>2</sup> ) | $V_{oc}$ (V) | FF   | $\eta$ (%) |
|-----------|--------------------------------|--------------|------|------------|
| 0         | 10.25                          | 0.67         | 0.42 | 2.88       |
| 8         | 10.11                          | 0.67         | 0.42 | 2.84       |
| 16        | 9.90                           | 0.67         | 0.42 | 2.78       |
| 24        | 9.67                           | 0.67         | 0.42 | 2.72       |
| 32        | 6.36                           | 0.66         | 0.41 | 2.53       |
| 40        | 8.72                           | 0.66         | 0.41 | 2.35       |
| 48        | 8.23                           | 0.66         | 0.41 | 2.22       |

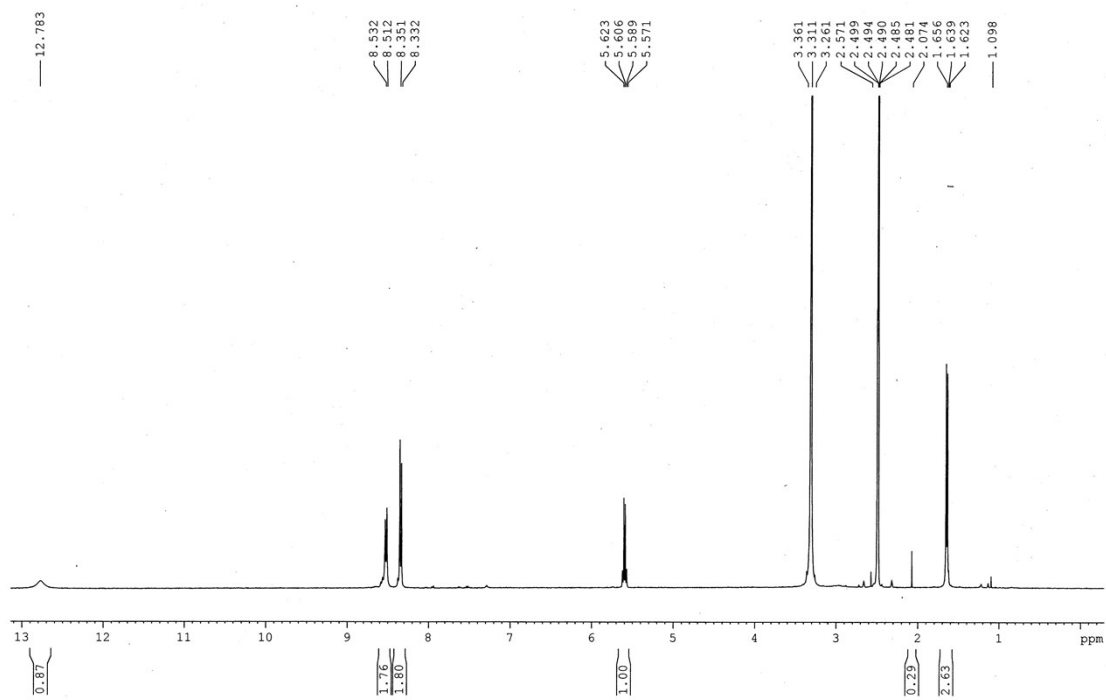

**Fig. S1** :  $^1\text{H}$  NMR spectrum of PTCDA in  $\text{DMSO-d}_6$

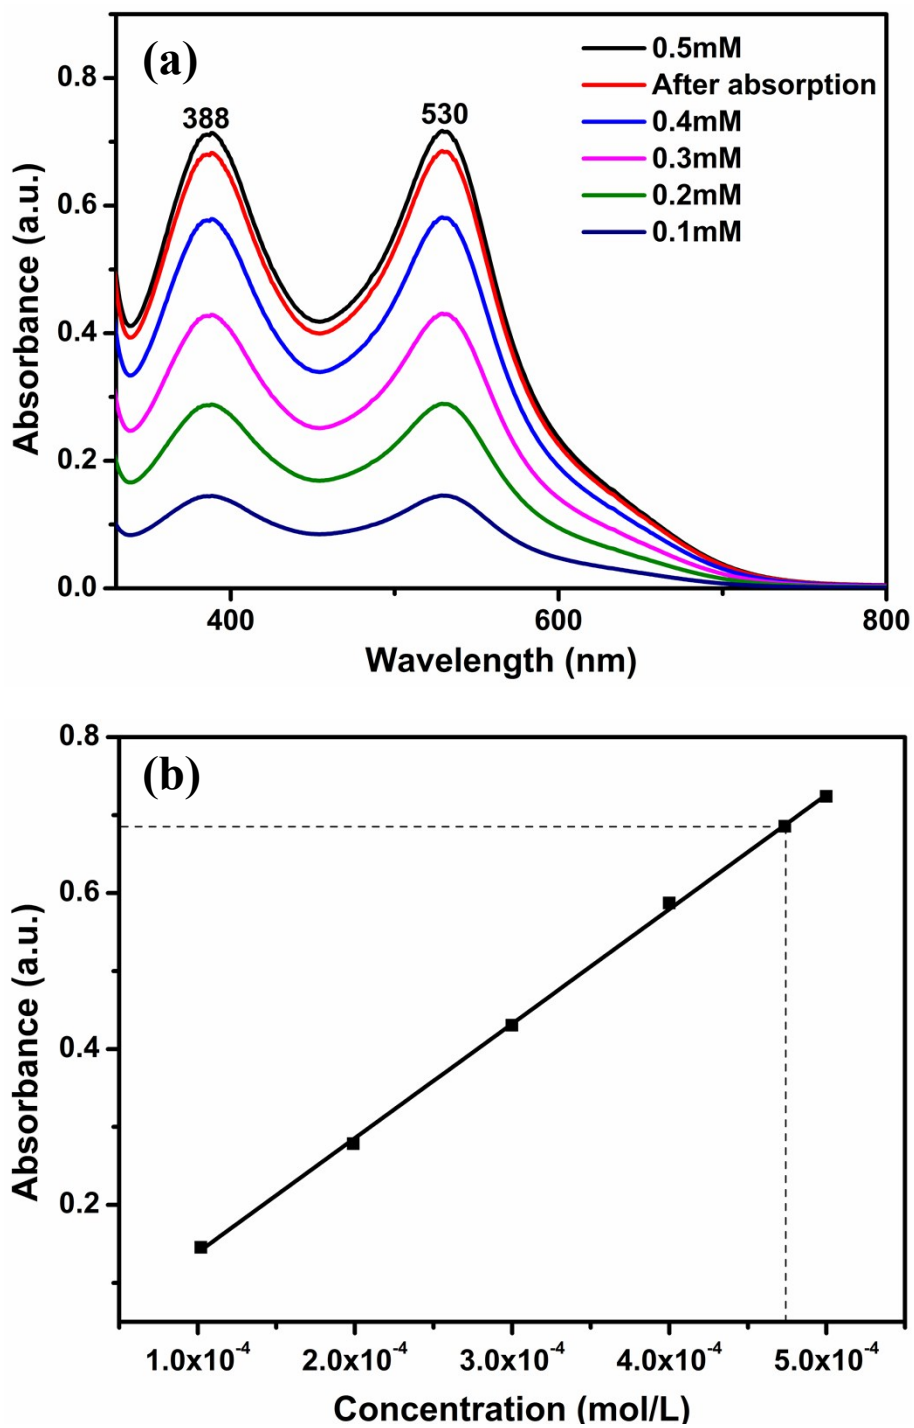

**Fig. S2:** (a) Absorbance spectra for N719 dye samples at different concentration in ethanol (b) Calibration curve for N719 dye samples at 530 nm along with the best fit curve.

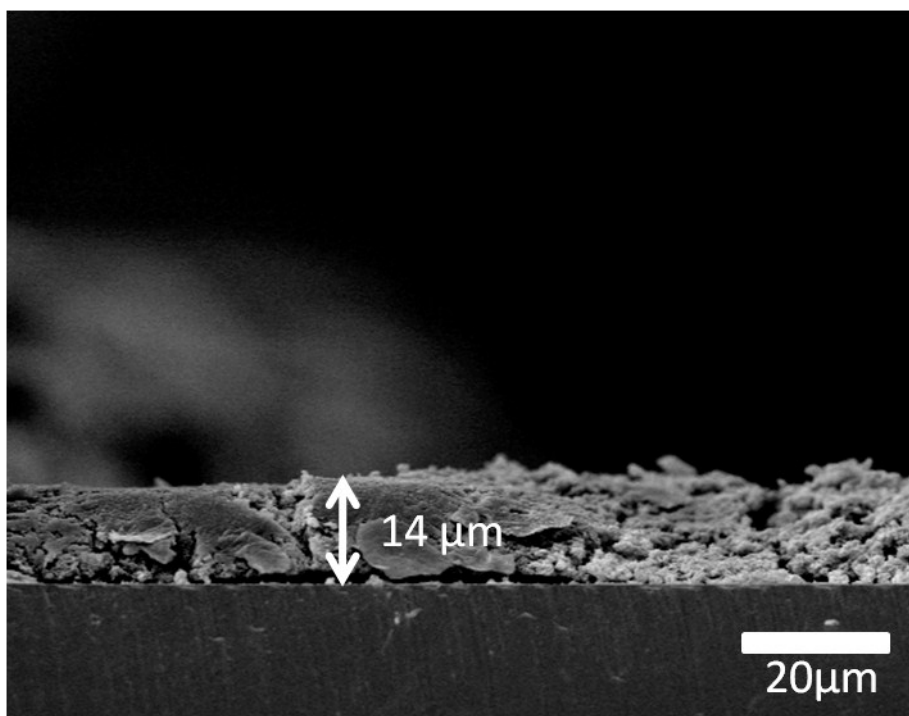

**Fig. S3:** Cross-sectional SEM image of active layer of P15 based DSSC device

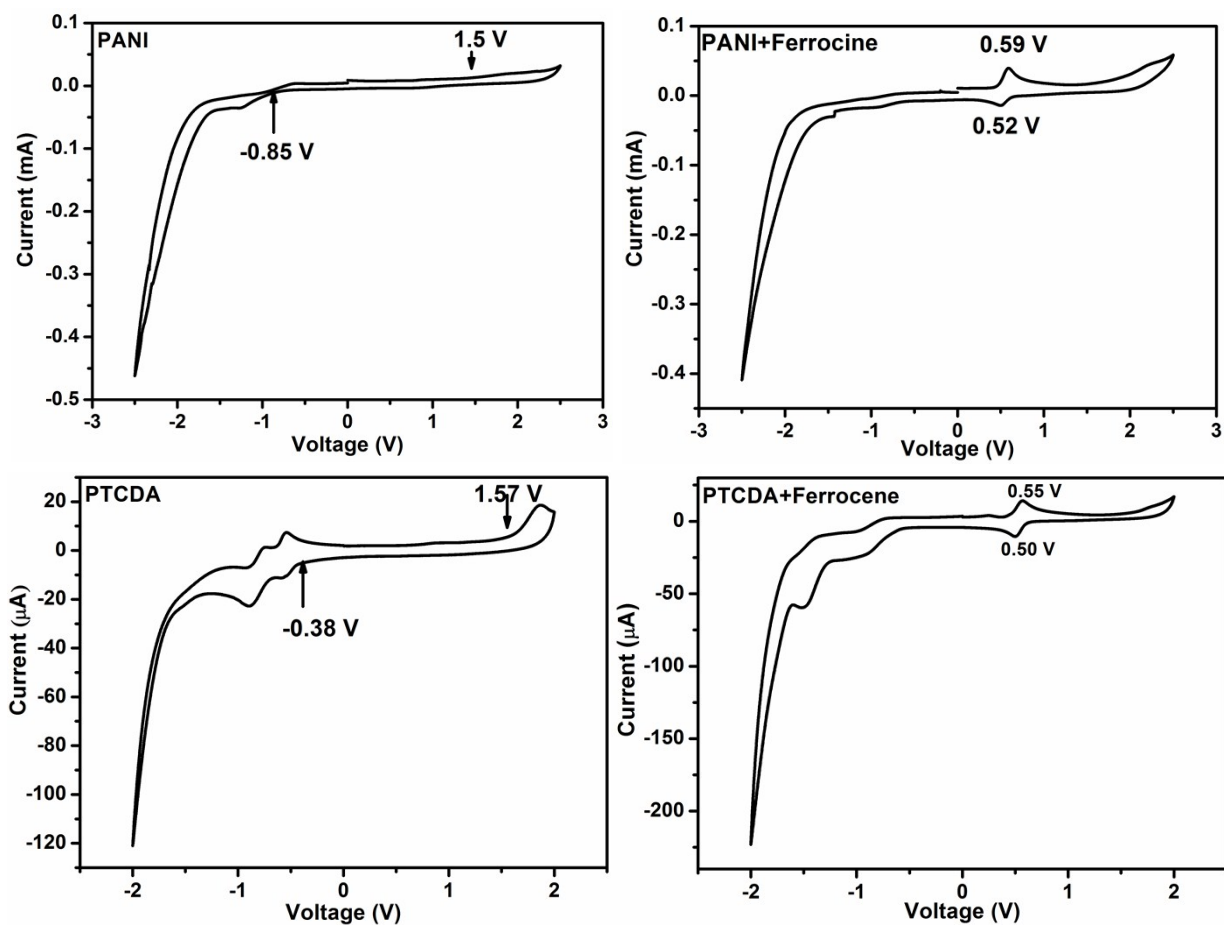

**Fig. S4:** Cyclic voltammogram plots of Pure PANI, PANI-Ferrocene, PTCDA and PTCDA-Ferrocene

The HOMO- LUMO levels are calculated according to the equation

$$\text{HOMO} = - [E_{\text{ox}}^{\text{onset}} - E_{\text{Fc/Fc}^{1/2}} + 4.8] \text{ V}$$

$$\text{LUMO} = - [E_{\text{red}}^{\text{onset}} - E_{\text{Fc/Fc}^{1/2}} + 4.8] \text{ V}$$

$$E_{\text{Fc/Fc}^{1/2}} \text{ of PANI-Ferrocene} = 0.56 \text{ V}$$

$$\text{HOMO level of PANI} = - 5.74 \text{ eV}$$

$$\text{LUMO level of PANI} = -3.39 \text{ eV}$$

$$\text{Band gap of PANI} = 2.35 \text{ eV}$$

$$E_{\text{ferrocene}^{1/2}} \text{ of PTCDA-Ferrocene} = 0.525 \text{ V}$$

$$\text{HOMO level of PTCDA} = - 5.85 \text{ V}$$

$$\text{LUMO level of PTCDA} = -3.90 \text{ V}$$

$$\text{Band gap level of PTCDA} = 1.95 \text{ eV}$$



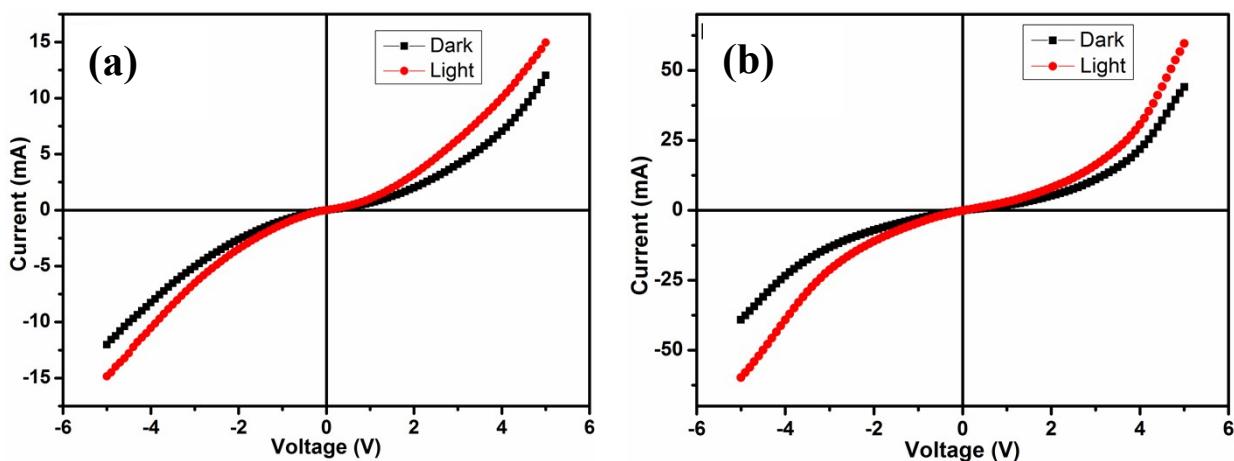

**Fig. S5:** Current-Voltage characteristics of (a) P10 and (b) P20 samples under dark and illumination condition.

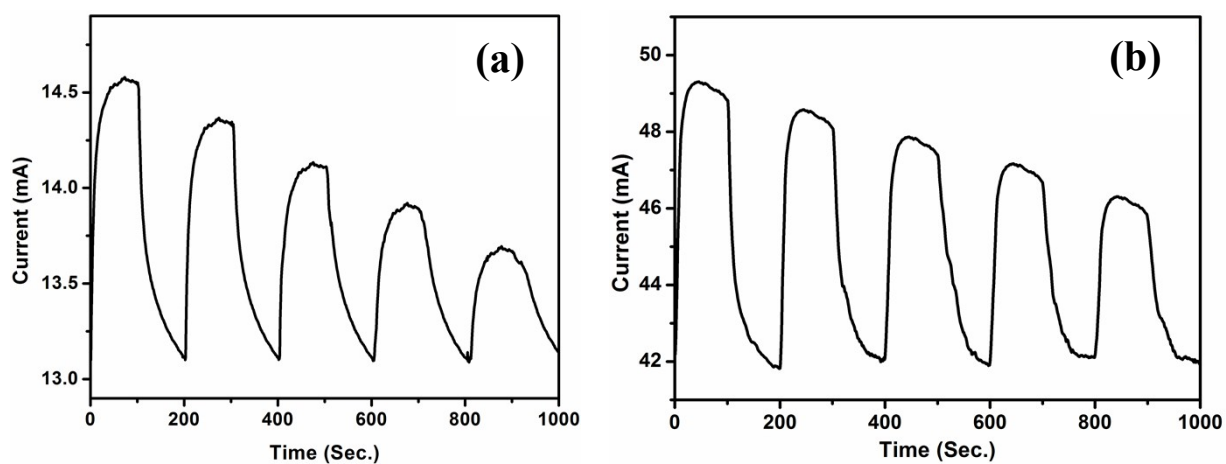

**Fig. S6:** On-Off cycle of photocurrent response of the (a) P10 and (b) P20 samples.

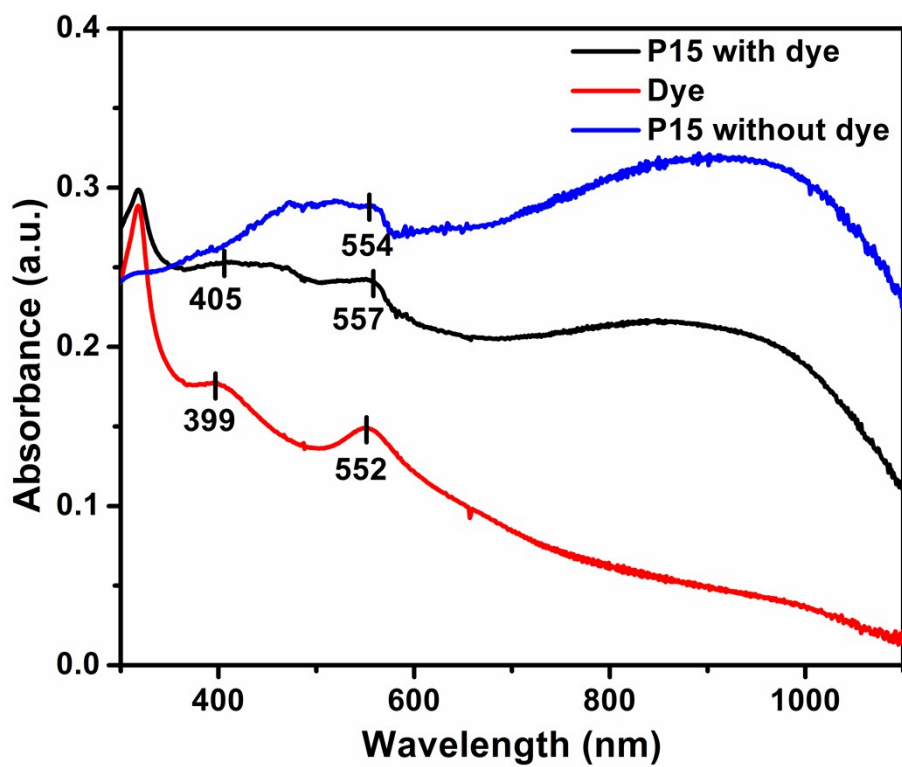

**Fig. S7:** Solid state UV-Vis spectra of N719 dye, P15 sample and the P15 sample after dye absorption
